# Supplementary material for: The Cavβ1a subunit regulates gene expression and suppresses myogenin in muscle progenitor cells
Source: PubMed Central journal article supplement — J Cell Biol. 2014 Jun 23;205(6):829–46. doi: 10.1083/jcb.201403021 (PMC4068134; doi:10.1083/jcb.201403021), 2014-06-23
Supplement: supp_jcb.201403021_JCB_201403021_sm.pdf [file supp_jcb.201403021_JCB_201403021_sm.pdf]

Taylor et al., <http://www.jcb.org/cgi/content/full/jcb.201403021/DC1>

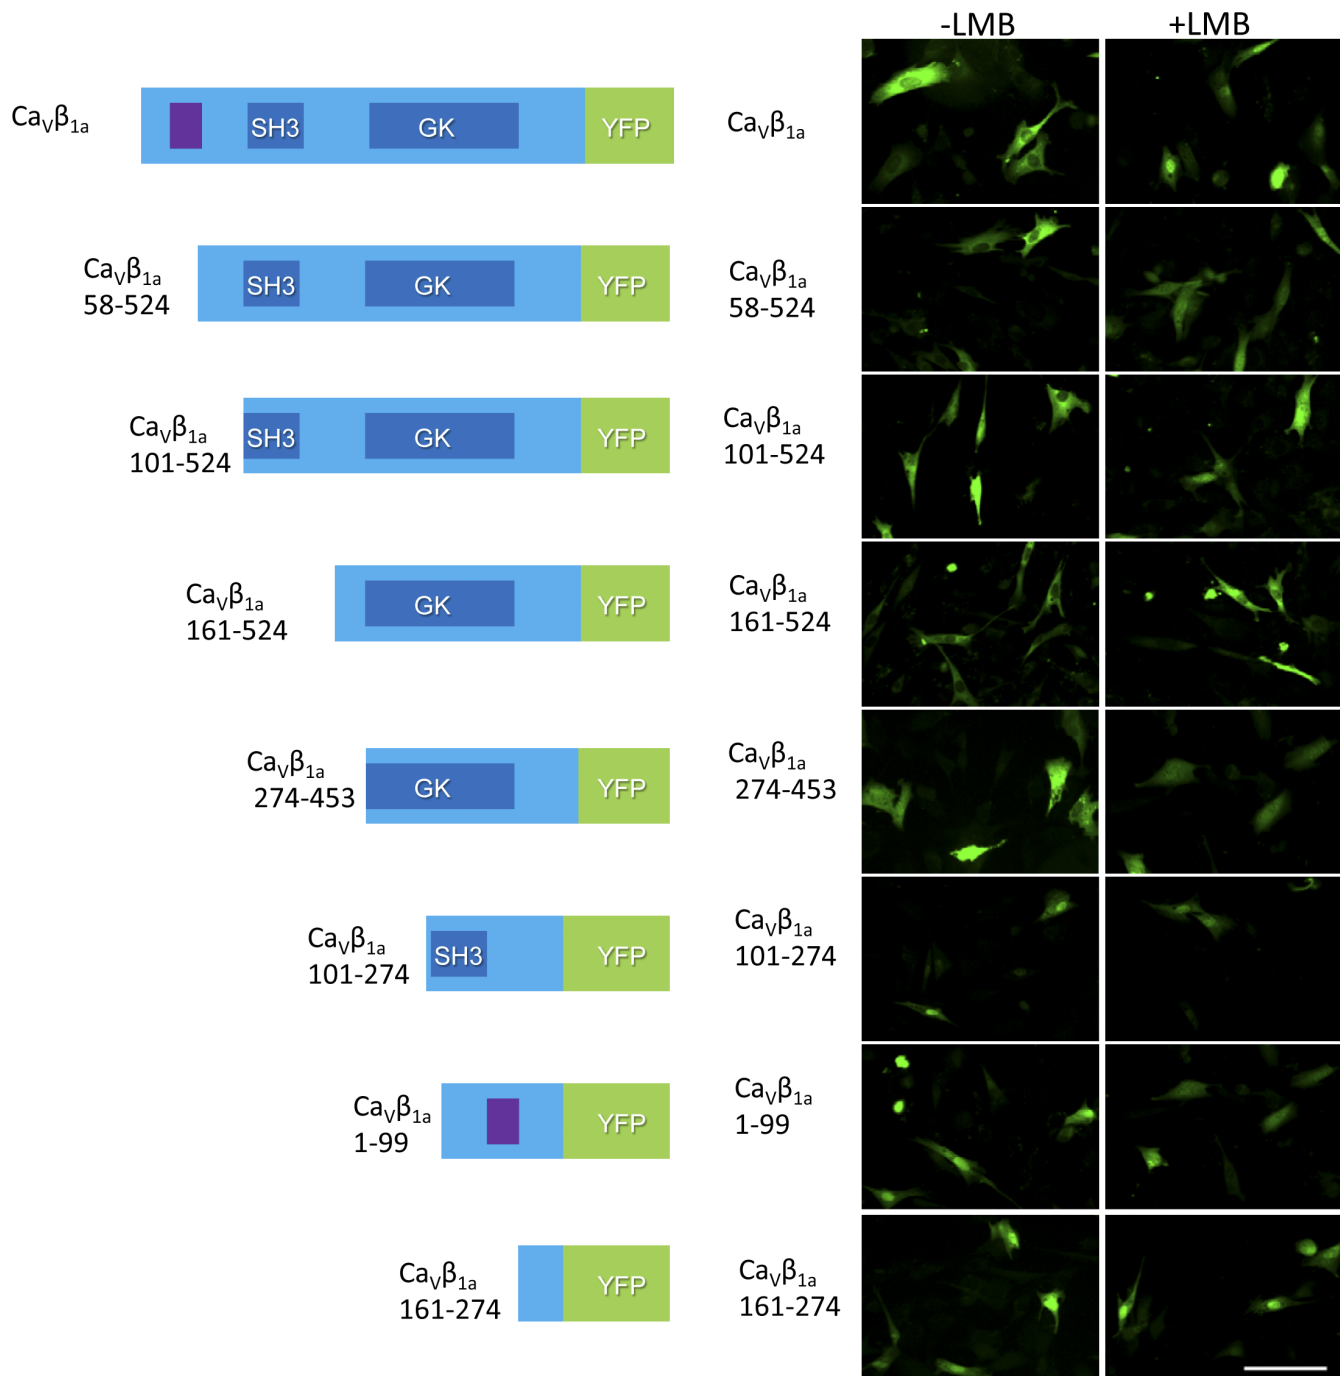

Figure S1. Representative images of Ca<sub>v</sub>β<sub>1a</sub>-YFP mutants with and without LMB treatment. Bar, 100 μm.

## C2C12 Proliferation

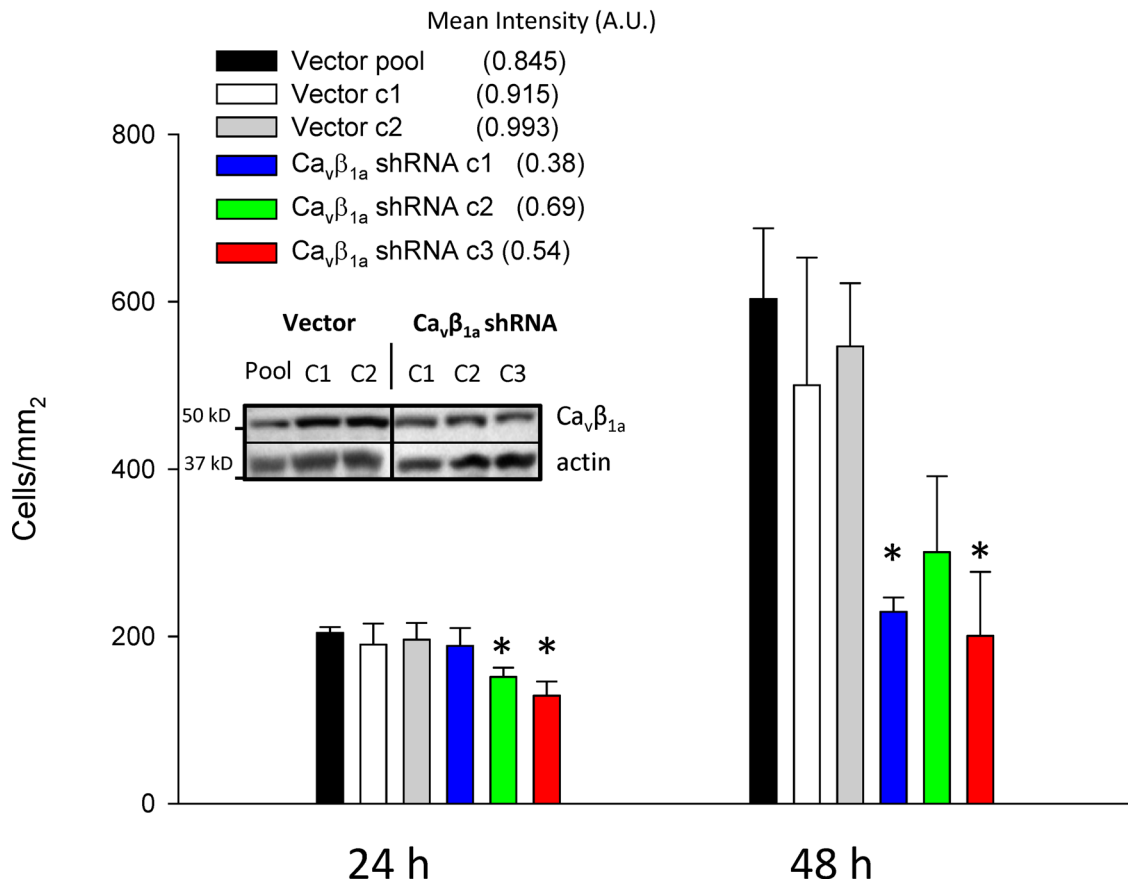

Figure S2. **shRNA-mediated knockdown of Ca<sub>v</sub>β<sub>1a</sub> impairs myoblast proliferation.** C2C12 myoblasts were transfected with pLKO.1 (vector) or Ca<sub>v</sub>β<sub>1a</sub> sequence-specific shRNA, and selected with puromycin. Individual clones were isolated and expanded (c1–c3), and compared with a vector-transfected pool of cells to control for freezing and extended passaging. Ca<sub>v</sub>β<sub>1a</sub> knockdown was evaluated by Western blot and the actin-normalized Ca<sub>v</sub>β<sub>1a</sub> intensity is presented in A.U. (average of two experiments). The proliferation rate of each group was evaluated by plating cells at equal densities and quantifying the number of cells per mm<sup>2</sup> using MetaMorph counting software (average of 10 fields per dish, *n* = 3 per group). Data represent mean ± SE (\*, *P* ≤ 0.05 compared with vector pool). Related to Fig. 4 of the main text.

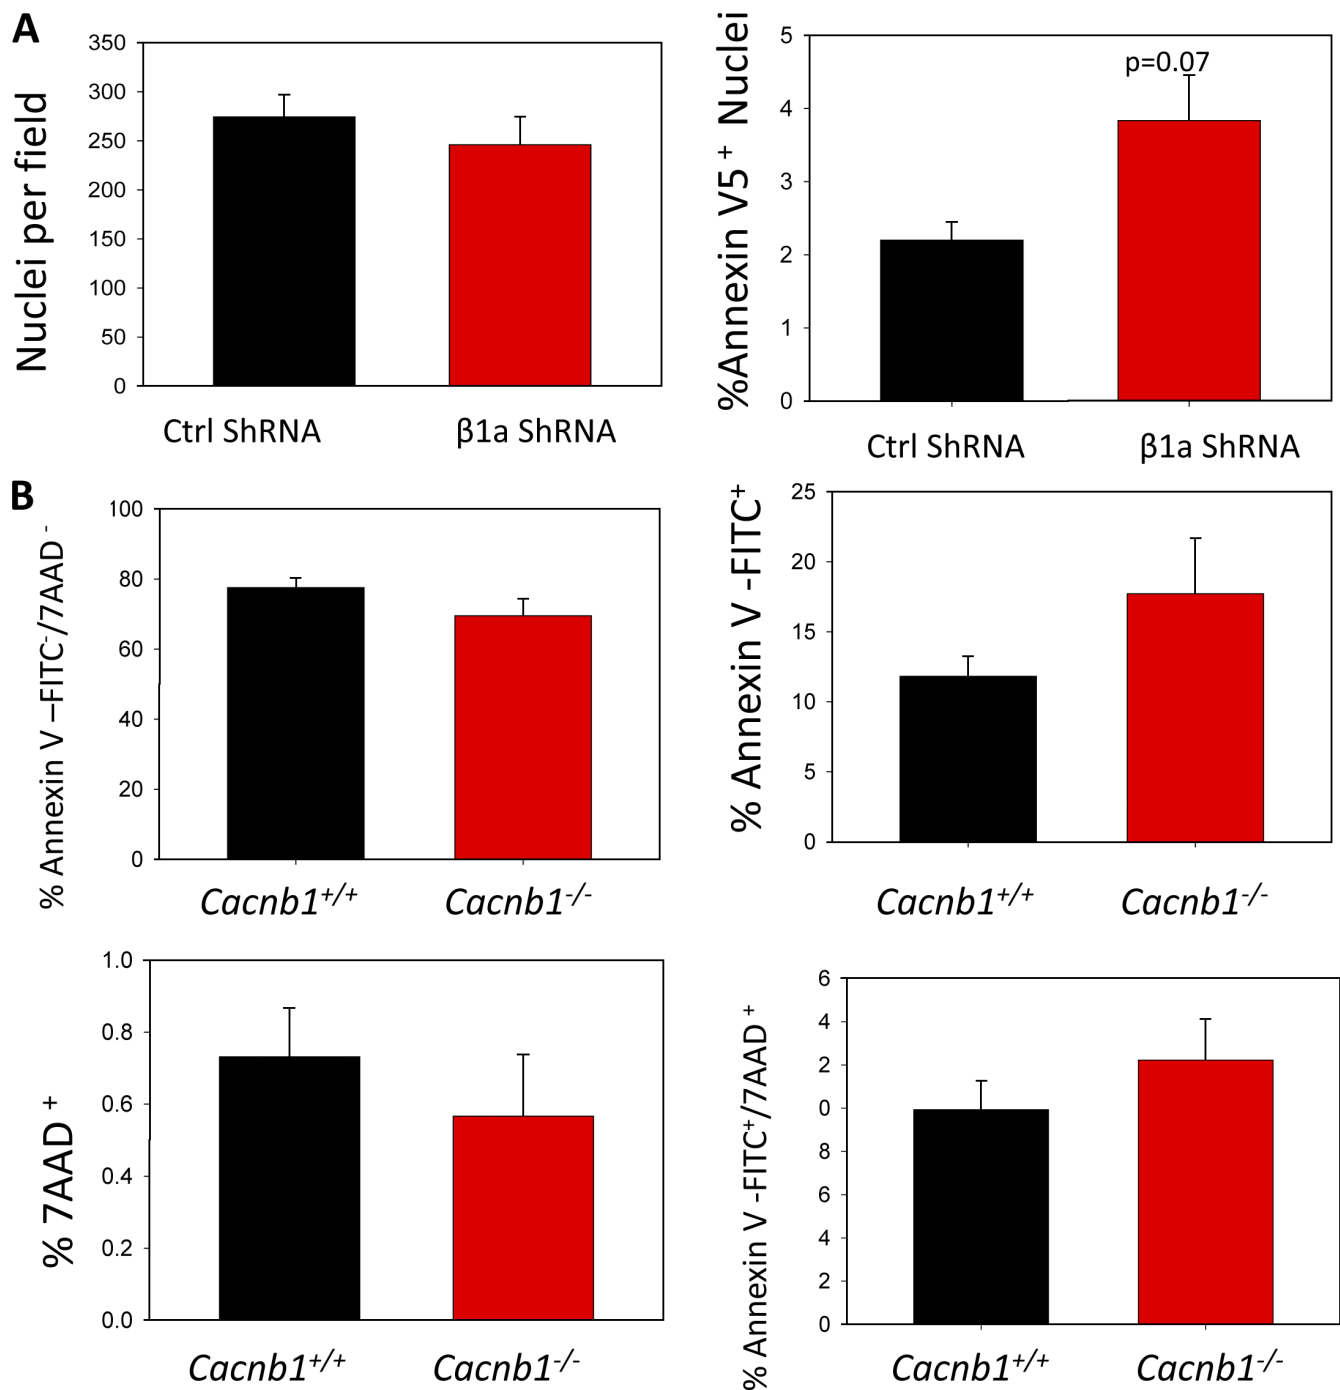

Figure S3. **Analysis of cell death in  $Ca_v\beta_{1\alpha}$  knockdown and *Cacnb1*<sup>-/-</sup> cells.** (A) Control and  $Ca_v\beta_{1\alpha}$  shRNA-treated primary myoblasts were stained with AnnexinV-FITC and quantified by fluorescent microscopy ( $n = 3$  each). (B) Cells were isolated from hindlimbs of E12.5 *Cacnb1*<sup>+/+</sup> ( $n = 4$ ) and *Cacnb1*<sup>-/-</sup> ( $n = 3$ ) mice by enzymatic digestion, preplated for 1 h on plastic, stained for AnnexinV-FITC and 7AAD, and analyzed by flow cytometry. AnnexinV is a marker of apoptosis, and 7AAD is a marker of general cell death.

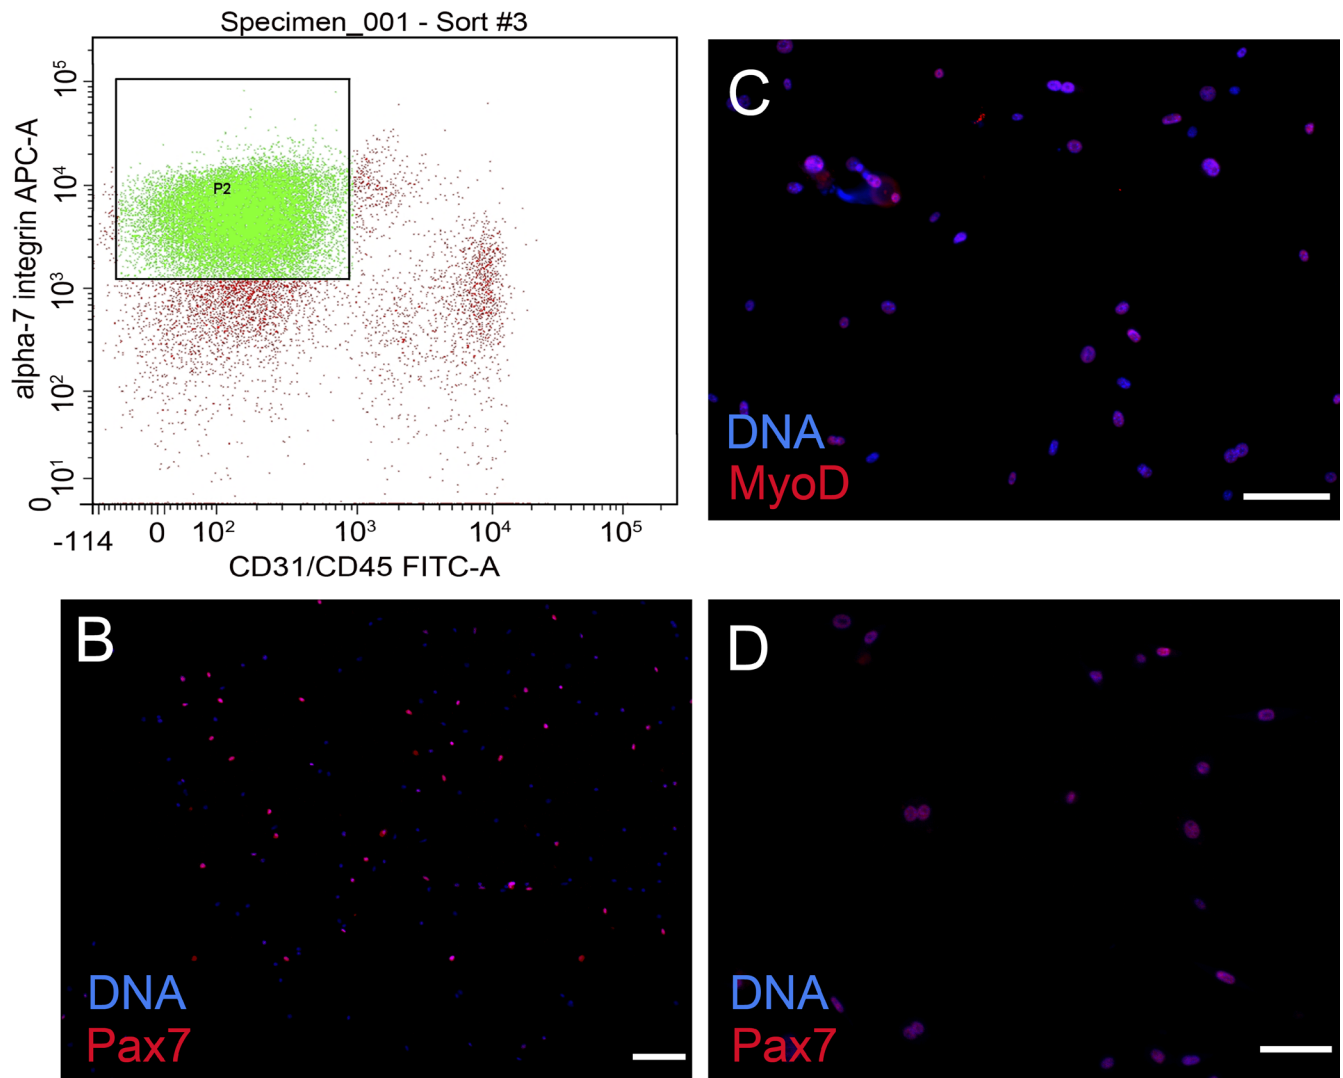

Figure S4. **FACS of muscle precursor cells from E18.5 embryos.** (A) Gating strategy for  $\alpha 7$  integrin-APC, CD45-FITC, CD31-FITC-labeled mononucleated cells isolated from skeletal muscle. Gate was set to isolate the  $\alpha 7$  integrin-APC<sup>+</sup>, CD45-FITC<sup>-</sup>, CD31-FITC<sup>-</sup> population. (B) Pax7 staining (red) of sorted cells immediately after FACS. Approximately 50% were Pax7<sup>+</sup>. (C and D) After several weeks in culture, >95% of cells were myoD (C) or Pax7 (D) positive. Bar, 100  $\mu$ m. Related to Figs. 1, 4, and 6 of the main text.

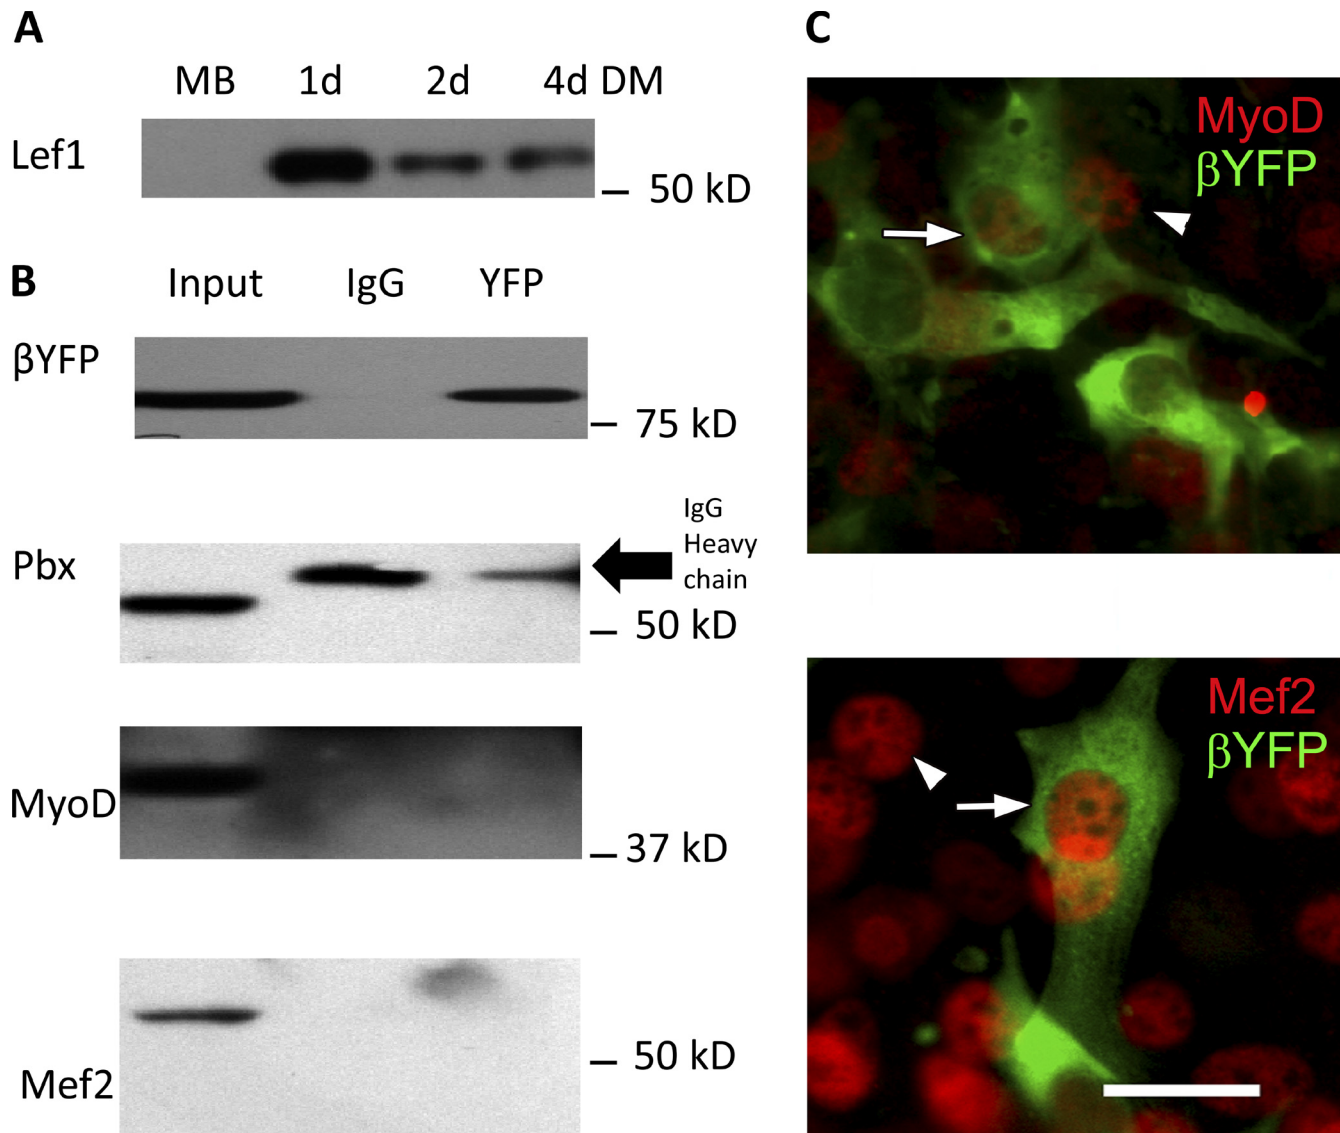

Figure S5. **Screening for  $Ca_v\beta_{1a}$ -binding partners at the *Myog* promoter.** (A) Western blot analysis of Lef1 protein in proliferating myoblasts (MB) and 1, 2, and 4 d differentiated myotubes. (B) Pbx, MyoD, or Mef2 are all expressed in proliferating myoblasts, but do not coimmunoprecipitate with  $Ca_v\beta_{1a}$ -YFP. All blots are from the same membrane.  $Ca_v\beta_{1a}$ -YFP is specifically precipitated by YFP antibody, but not nonspecific control IgG (top). (C) Immunofluorescent images of MyoD (top) and Mef2 (bottom) localization (red) in  $Ca_v\beta_{1a}$ -YFP cells. Arrow points to  $Ca_v\beta_{1a}$ -YFP-expressing cell, arrowhead points to untransfected cell.

Table S1. List of primers used in this study

| Primer name                              | Forward (5'→3'), or sequence (shRNA), or product ID (TaqMan probes) | Reverse (5'→3')                | Experiment                                       |
|------------------------------------------|---------------------------------------------------------------------|--------------------------------|--------------------------------------------------|
| Ca <sub>v</sub> β <sub>1α</sub>          | GTCCAGAAGAGCGGCATGTC                                                | GAAGGGGATGCGCTTGCCGT           | RT-PCR                                           |
| β-Actin                                  | TGAGCTGCGTTTACACCCCTTCT                                             | ACTCAGGGCATGGACGCGAC           | RT-PCR                                           |
| Ca <sub>v</sub> β <sub>1α</sub> -58-524  | GCTAGAATCCATGTCGACGGGAGCACCT                                        | GCTAGTCGACATGGCATGTTCTGTC      | Ca <sub>v</sub> β <sub>1α</sub> -YFP truncations |
| Ca <sub>v</sub> β <sub>1α</sub> -101-524 | GCTAGAATCCATGGTGGCTTTTGTGTTCCGACAAAT                                | GCTAGTCGACATGGCATGTTCTGTC      | Ca <sub>v</sub> β <sub>1α</sub> -YFP truncations |
| Ca <sub>v</sub> β <sub>1α</sub> -161-524 | GCTAGAATCCATGAGGCCCATCATCTGGTG                                      | GCTAGTCGACTGGTTTGGTCTTGGCTTT   | Ca <sub>v</sub> β <sub>1α</sub> -YFP truncations |
| Ca <sub>v</sub> β <sub>1α</sub> -101-274 | GCTAGAATCCATGCCCGTCAAACCTGGACAGC                                    | GCTAGTCGACGGAAGGCACCACGTC      | Ca <sub>v</sub> β <sub>1α</sub> -YFP truncations |
| Ca <sub>v</sub> β <sub>1α</sub> -1-99    | GCTAGAATCCATGGTCCAGAAGAGCGGCATGTC                                   | GCTAGGATCCTTTGGTCTTGGCTTCTCGAG | Ca <sub>v</sub> β <sub>1α</sub> -YFP truncations |
| Ca <sub>v</sub> β <sub>1α</sub> -161-274 | GCTAGAATCC ATG GTGGCTTTTGTGTTCCGACAAAT                              | GCTAGTCGACGGAAGGCACCACGTC      | Ca <sub>v</sub> β <sub>1α</sub> -YFP truncations |
| 69048<br>(Open Biosystems)               | CCGGCCAGTGGTAATGAAATGACTACTCGAGTAGTCA-TTTCATTACCACTGGTTTTTG         |                                | shRNA                                            |
| 69049<br>(Open Biosystems)               | CCGGCCCAGCAAACACATCATCTCTCGAGAATGAT-GATGTGTTTGGCTGGTTTTTG           |                                | shRNA                                            |
| 69050<br>(Open Biosystems)               | CCGGCGAGGGAAGTCTCAATCCAAACTCGAGTTTGG-ATTGAGACTCCCTCGTTTTTG          |                                | shRNA                                            |
| 69051<br>(Open Biosystems)               | CCGGCCTCGGATACAACATCCAACACTCGAGTGTGG-ATGTTGTATCCGAGTTTTTG           |                                | shRNA                                            |
| 69052<br>(Open Biosystems)               | CCGGGCTCAGGAGAAATCTCAGCTTCTCGAGAAGCTG-AGATTCTCCTGAGCTTTTTG          |                                | shRNA                                            |
| SHC002<br>(Sigma-Aldrich)                | CCGGCAACAAGATGAAGAGCACCAACTCGAGTTGGT-GCTCTTCATCTTGTGTTTTT           |                                | shRNA                                            |
| Casp2                                    | TGCAGCCCAGGAAAAGCTGG                                                | AGGCGAGAAGTAGCGCGGGA           | ChIP-PCR                                         |
| Dlx2                                     | GCGGGCAACGTACCTAGCA                                                 | GTCCTGTTGCGGGCCATCCC           | ChIP-PCR                                         |
| Cbx5#1                                   | ACGGATCCTTCCCTGCGCCT                                                | ACGATGTTCCGCCTGCTGCC           | ChIP-PCR                                         |
| Cbx5#2                                   | GGCAGCAGGCGGAACATCGT                                                | ACGGCATCCGTTTGGGCGTT           | ChIP-PCR                                         |
| Pax3#1                                   | GGCGGACGAGTTTGGTGCGA                                                | GCACTCGGTGTCACGACGGG           | ChIP-PCR                                         |
| Pax3#2                                   | CCCCTCGTGACACCGAGTGC                                                | GCCTGGGGACCGTCAGGGAT           | ChIP-PCR                                         |
| Tbx5                                     | GACGCTCGCTTGTCCGTGT                                                 | AGAGGTCGGGTGGGTCTGCG           | ChIP-PCR                                         |
| Tnnt3                                    | CCCCACCAGCCACACACGAC                                                | GGCCATGAGCAGACCTCGCC           | ChIP-PCR/ChIP-qPCR                               |
| Tnnt3                                    | GCCTGCTTGGGCACACCCTC                                                | GGCTGGGGGCTCCTGTGGA            | ChIP-PCR                                         |
| Wnt3                                     | GCCCAAGCCGACCCCTCAC                                                 | GCCCGCGCCTAAGGTAAG             | ChIP-PCR                                         |
| BDNF 1                                   | TGATCATCACTACGACCACG                                                | CAGCCTCTGAGCCAGTTACG           | ChIP-PCR                                         |
| Cacnb1                                   | GAGAGACATGACAGACTCAGCTCGGAGA                                        | ACACCCCTGCCAGTGGTAAGAGC        | ChIP-PCR/ChIP-qPCR                               |
| Myog (Applied Biosystems)                | Mm00446194_m1                                                       |                                | qPCR                                             |
| GAPDH (Applied Biosystems)               | Mm03302249_g1                                                       |                                | qPCR                                             |
| Myog 5'                                  | CAGCAGGGAGGGTTAAATGG                                                | CCATCAGGTCGGAAAAGGCTT          | ChIP-qPCR                                        |
| Myog 3'                                  | AGCAGCTTCTCACACCCTC                                                 | GACCCCTGGCACTGCTATGT           | ChIP-qPCR                                        |
| ChIP-chip motif sequence 1 (NC E-box)    | GAGGCC <u>AGCCTG</u> GTCTACAAAGTGAGTCCAGGACA-GCCAG                  |                                | GSMA                                             |
| ChIP-chip motif sequence 2 (O-box)       | TGGTGGCGCATGCCTT <u>TAAT</u> CCAGCACTCGGGAG                         |                                | GSMA                                             |
| Myog promoter                            | CGTCTGATGTGCAGCAAC <u>AGCTT</u> AGA                                 |                                | GSMA                                             |

Underlined letters represent DNA consensus motifs of ChIP-seq-identified NC E-box, O-box, and NC E-box within Myog promoter, respectively..

Table S2. List of antibodies used in this study

| Name                            | Supplier                                       | Clone   | Antigen                                                    | Host   | Dilution  | Application(s)        |
|---------------------------------|------------------------------------------------|---------|------------------------------------------------------------|--------|-----------|-----------------------|
| <b>Primary antibodies</b>       |                                                |         |                                                            |        |           |                       |
| Ca <sub>v</sub> β <sub>1a</sub> | Santa Cruz<br>Biotechnology, Inc.              | H50     | Human Ca <sub>v</sub> β <sub>1a</sub><br>(internal region) | Rabbit | 1:500     | WB, ICC               |
| Ca <sub>v</sub> β <sub>1a</sub> | GeneTex                                        | C1C3    | Human Ca <sub>v</sub> β <sub>1a</sub><br>(internal region) | Rabbit | 1:500     | WB                    |
| Actin                           | EMD Millipore                                  | C4      | Chicken gizzard actin                                      | Mouse  | 1:500,000 | WB                    |
| Ca <sub>v</sub> 1.1             | Developmental Studies<br>Hybridoma Bank (DSHB) | IIID5E1 | Rabbit DHPR <sub>α1s</sub> subunit                         | Mouse  | 1:10,000  | WB                    |
| Troponin T                      | DSHB                                           | RV-C2   | Rabbit troponin T                                          | Mouse  | 1:500     | WB                    |
| Normal mouse IgG                | Santa Cruz<br>Biotechnology, Inc.              | SC-2025 | –                                                          | Mouse  | 1:500     | WB, ICC               |
| Normal rabbit IgG               | Santa Cruz<br>Biotechnology, Inc.              | SC-2027 | –                                                          | Rabbit | 1:500     | WB, ICC,<br>ChIP-chip |
| α-Tubulin                       | Sigma-Aldrich                                  | DM1A    | Chicken embryo tubulin                                     | Mouse  | 1:1,000   | WB                    |
| GAPDH                           | Imgenex                                        | 1D4     | Pig GAPDH                                                  | Mouse  | 1:1,000   | WB                    |
| HP1                             | Santa Cruz<br>Biotechnology, Inc.              | FL-191  | Human HP1α                                                 | Rabbit | 1:500     | WB                    |
| GFP                             | Invitrogen                                     | 3E6     | Recombinant GFP                                            | Mouse  | 1:50      | IP, ChIP              |
| α7 integrin-APC                 | AbLab                                          | R2F2    | α7 integrin                                                | Rat    | 1:50      | FACS                  |
| CD31-FITC                       | eBioscience                                    | 390     | Mouse CD31                                                 | Rat    | 1:50      | FACS                  |
| CD45-FITC                       | eBioscience                                    | 30-F11  | Mouse CD45                                                 | Rat    | 1:50      | FACS                  |
| Ki67                            | Novus Biologicals                              | SP6     | Human Ki67, synthetic<br>C terminus peptide                | Rabbit | 1:500     | ICC/IHC               |
| Pax7                            | DSHB                                           | PAX7    | Chicken Pax7                                               | Mouse  | 1:100     | ICC/IHC               |
| Myogenin                        | DSHB                                           | F5D     | Rat myogenin                                               | Mouse  | 1:100     | ICC/IHC               |
| <b>Secondary antibodies</b>     |                                                |         |                                                            |        |           |                       |
| Sheep anti-mouse HRP            | Santa Cruz<br>Biotechnology, Inc.              | NA931VS | Mouse IgG                                                  | Sheep  | 1:25,000  | WB                    |
| Donkey anti-rabbit HRP          | GE Healthcare                                  | NA9340V | Rabbit IgG                                                 | Donkey | 1:25,000  | WB                    |
| Alexa Fluor 488                 | Invitrogen                                     |         | IgG heavy chains and<br>other Ig light chains              | Goat   | 1:1,000   | ICC/IHC               |
| Alexa Fluor 568                 | Invitrogen                                     |         | IgG heavy chains and<br>other Ig light chains              | Goat   | 1:1,000   | ICC/IHC               |

Table S3. ChIP buffers

| Buffer name                                                  | Buffer recipe                                                                                                                                             |
|--------------------------------------------------------------|-----------------------------------------------------------------------------------------------------------------------------------------------------------|
| Pre-IP dilution buffer (store at RT)                         | 10 mM Tris-HCl (made from stock 1 M Tris-HCl, pH 7.5), 10 mM NaCl, 3 mM MgCl <sub>2</sub> , 1 mM CaCl <sub>2</sub> , 4% IGEPAL, and 1 mM PMSF (add fresh) |
| IP dilution buffer (store at RT without protease inhibitors) | 20 mM Tris-HCl (made from stock 1 M Tris-HCl, pH 8), 2 mM EDTA, 1% Triton X-100, 150 mM NaCl, and protease inhibitor stock (add fresh)                    |
| Protease inhibitor stock                                     | Prepare a 25× stock by dissolving 1 protease inhibitor tablet in 2 mL of nuclease-free water (store at –20°C)                                             |
| ChIP wash 1 (store at RT)                                    | 20 mM Tris-HCl (made from stock 1 M Tris-HCl, pH 8), 2 mM EDTA, 1% Triton X-100, 150 mM NaCl, and 1 mM PMSF (add fresh)                                   |
| ChIP wash 2 (store at RT)                                    | 20 mM Tris-HCl (made from stock 1 M Tris-HCl, pH 8), 2 mM EDTA, 1% Triton X-100, 0.1% SDS, 500 mM NaCl, and 1 mM PMSF (add fresh)                         |
| ChIP wash 3 (store at RT)                                    | 10 mM Tris-HCl (made from stock 1 M Tris-HCl, pH 8), 1 mM EDTA, 0.25 M LiCl, 0.5% IGEPAL, and 0.5% deoxycholate (sodium salt)                             |
| Elution buffer                                               | 25 mM Tris-HCl (made from stock 1 M Tris-HCl, pH 7.5), 10 mM EDTA, and 0.5% SDS (store at room temperature)                                               |

Tables S4, S5, and S6 are available online as Microsoft Excel files.
